# Supplementary material
Source: PubMed Central journal article supplement (PMC1242264)
Supplement: plntcell_tpc.105.035766_1.pdf [file plntcell_tpc.105.035766_1.pdf]

## Supplementary Figure 1

|      |                                            |     |
|------|--------------------------------------------|-----|
| Ft   | ..MSINIRDPLIVSRVVGDVLDPFNRSITLKWTYGQREVT   | 38  |
| Hd3a | MAGSGRDRDPLVWGRVVGDVLDAFVRSITNLKWTYGSKTVS  | 40  |
| Sp3d | ...MPRERDPLVWGRVVGDVLDPFTRTIGLRWIYRDREWN   | 37  |
|      |                                            |     |
| Ft   | NGLDLRPSQVQNKPRVEIGGEDLRNFYTLVMVDPDVPSPS   | 78  |
| Hd3a | NGCELKPSMVT HQPRVEVGGNDMRTFYTLVMVDPDAPSPS  | 80  |
| Sp3d | NGCEL RPSQVINQPRVEVGGDDLRTFFTLVMVDPDAPSPS  | 77  |
|      |                                            |     |
| Ft   | NPHLREY LHVLVTDIPATTGTTFGNEIVCYENPSPTAGIH  | 118 |
| Hd3a | DPNLREY LHVLVTDIPGTTAASFGQEVMCYESPRPTMGIH  | 120 |
| Sp3d | DPNLREY LHVLVTDIPATTGSSFGQEI VSYESPRPSMGIH | 117 |
|      |                                            |     |
| Ft   | RVVFILFRQLGRQTVYAPGWRQNFNTREFAEIYNLGLPVA   | 158 |
| Hd3a | RLVFWLFCQLGRQTVYAPGWRQNFNTKDFAE LYNL GSPVA | 160 |
| Sp3d | RFVFWLFRQLGRQTVYAPGWRQNFNTRDFAELYNLGLPVA   | 157 |
|      |                                            |     |
| Ft   | AVFYNCQRESGC GRRRL                         | 175 |
| Hd3a | AVFYNCQREAGS GRRRVYN                       | 179 |
| Sp3d | AVFYNCQRESGS GRRRSA                        | 176 |
