# Supplementary material
Source: PubMed Central journal article supplement (PMC1242264)
Supplement: plntcell_tpc.105.035766_4.pdf [file plntcell_tpc.105.035766_4.pdf]

**Supplemental Table 1:** Flowering time of Pro35S:FT plants in different environmental conditions.

| A <sup>g</sup>         | Day-length              | Repeat #               | Rosette                |                    |                  | Cauline     |             |      | Total        |              |       |                     |    |
|------------------------|-------------------------|------------------------|------------------------|--------------------|------------------|-------------|-------------|------|--------------|--------------|-------|---------------------|----|
|                        |                         |                        | Avg <sup>c</sup>       | S.E.M <sup>d</sup> | Rng <sup>e</sup> | Avg         | S.E.M       | Rng  | Avg          | S.E.M        | Rng   | # Rpts <sup>f</sup> |    |
| Long Days <sup>a</sup> | 1                       | L.er                   | <b>8.43</b>            | 0.20               | 8-9              | <b>3.57</b> | 0.30        | 3-5  | <b>12.00</b> | 0.22         | 11-13 | 7                   |    |
|                        |                         | Pro <sub>35S</sub> :FT | <b>2.00</b>            | 0.00               | 2                | <b>2.00</b> | 0.00        | 2    | <b>4.00</b>  | 0.00         | 4     | 9                   |    |
|                        | 2                       | L.er                   | <b>9.17</b>            | 0.48               | 8-11             | <b>4.50</b> | 0.43        | 3-5  | <b>13.67</b> | 0.76         | 12-16 | 6                   |    |
|                        |                         | Pro <sub>35S</sub> :FT | <b>2.00</b>            | 0.00               | 2                | <b>2.00</b> | 0.00        | 2    | <b>4.00</b>  | 0.00         | 4     | 9                   |    |
|                        | 3                       | L.er                   | <b>9.00</b>            | 0.53               | 7-11             | <b>3.71</b> | 0.18        | 3-4  | <b>12.71</b> | 0.64         | 10-15 | 7                   |    |
|                        |                         | Pro <sub>35S</sub> :FT | <b>2.00</b>            | 0.00               | 2                | <b>2.00</b> | 0.00        | 2    | <b>4.00</b>  | 0.00         | 4     | 9                   |    |
|                        | 4                       | L.er                   | <b>8.67</b>            | 0.33               | 8-10             | <b>3.83</b> | 0.31        | 3-5  | <b>12.50</b> | 0.56         | 11-15 | 6                   |    |
|                        |                         | Pro <sub>35S</sub> :FT | <b>2.00</b>            | 0.00               | 2                | <b>2.00</b> | 0.00        | 2    | <b>4.00</b>  | 0.00         | 4     | 5                   |    |
|                        | 5                       | L.er                   | <b>9.00</b>            | 0.42               | 8-11             | <b>3.88</b> | 0.35        | 3-5  | <b>12.88</b> | 0.64         | 11-15 | 8                   |    |
|                        |                         | Pro <sub>35S</sub> :FT | <b>2.00</b>            | 0.00               | 2                | <b>2.00</b> | 0.00        | 2    | <b>4.00</b>  | 0.00         | 4     | 5                   |    |
|                        | Short Days <sup>b</sup> | 1                      | L.er                   | <b>30.44</b>       | 0.56             | 29-33       | <b>8.89</b> | 0.45 | 6-10         | <b>39.33</b> | 0.65  | 37-43               | 9  |
|                        |                         |                        | Pro <sub>35S</sub> :FT | <b>2.00</b>        | 0.00             | 2           | <b>1.70</b> | 0.15 | 1-2          | <b>3.70</b>  | 0.15  | 3-4                 | 10 |
|                        |                         | 2                      | L.er                   | <b>27.25</b>       | 0.41             | 25-29       | <b>8.63</b> | 0.46 | 6-10         | <b>35.88</b> | 0.77  | 31-38               | 8  |
|                        |                         |                        | Pro <sub>35S</sub> :FT | <b>2.38</b>        | 0.18             | 2-3         | <b>1.63</b> | 0.18 | 1-2          | <b>4.00</b>  | 0.00  | 4                   | 8  |
| 3                      |                         | L.er                   | <b>25.38</b>           | 0.60               | 23-28            | <b>8.38</b> | 0.53        | 5-10 | <b>33.75</b> | 0.90         | 29-36 | 8                   |    |
|                        |                         | Pro <sub>35S</sub> :FT | <b>2.00</b>            | 0.00               | 2                | <b>1.75</b> | 0.16        | 1-2  | <b>3.75</b>  | 0.16         | 3-4   | 8                   |    |
| 4                      |                         | L.er                   | <b>26.13</b>           | 0.40               | 24-27            | <b>8.63</b> | 0.32        | 7-10 | <b>34.75</b> | 0.59         |       | 8                   |    |
|                        |                         | Pro <sub>35S</sub> :FT | <b>2.00</b>            | 0.00               | 2                | <b>2.00</b> | 0.32        | 1-3  | <b>4.00</b>  | 0.32         | 5-3   | 6                   |    |
| 5                      |                         | L.er                   | <b>25.38</b>           | 0.64               | 23-27            | <b>8.38</b> | 0.57        | 5-10 | <b>33.75</b> | 0.96         | 29-36 | 8                   |    |
|                        |                         | Pro <sub>35S</sub> :FT | <b>2.38</b>            | 0.20               | 2-3              | <b>1.63</b> | 0.20        | 1-2  | <b>4.00</b>  | 0.00         | 4     | 8                   |    |
| B <sup>h</sup>         | Blue Long Days          | L.er                   | <b>6.00</b>            | 0.00               | 6                | <b>2.50</b> | 0.50        | 2-3  | <b>8.50</b>  | 0.50         | 6-9   | 2                   |    |
|                        |                         | Pro <sub>35S</sub> :FT | <b>2.00</b>            | 0.00               | 2                | <b>1.67</b> | 0.33        | 2-1  | <b>3.67</b>  | 0.33         | 3-4   | 3                   |    |

<sup>a</sup>Long days. 16/8 day/night photoperiods.

<sup>b</sup>Short days. 8/16 day/night photoperiods.

<sup>c</sup>Avg= average.

<sup>d</sup>S.E.M = standard error of the mean.

<sup>e</sup>Rng= range.

<sup>f</sup>#rpts= number of plants.

<sup>g</sup>Normal white light conditions.

<sup>h</sup>Special light quality.
