# Supplementary material
Source: PubMed Central journal article supplement (PMC1242264)
Supplement: plntcell_tpc.105.035766_5.pdf [file plntcell_tpc.105.035766_5.pdf]

**Supplemental table 2.** Leaf Curling and Flowering time of a *Pro<sub>35S</sub>:TFT#7 X sep3-2* segregating F2 population.

| A.                                                    | # Plants <sup>a</sup> | % Early Flowering (less than 3 rosette) |          | % CURLED      |          |
|-------------------------------------------------------|-----------------------|-----------------------------------------|----------|---------------|----------|
|                                                       |                       | In population                           | Expected | In population | Expected |
| <i>Pro<sub>35S</sub>:TFT (L.er)</i>                   | 10                    | 100.0                                   | 100      | 100           | 100      |
| <i>Pro<sub>35S</sub>TFT x Col-0 ; F2</i>              | 29                    | 55.2                                    | 75       | 75.9          | 75.0     |
| <i>Pro<sub>35S</sub>TFT(L.er) xsep3-2 (Col-0); F2</i> | 36                    | 36.1                                    | 75       | 19.4          | 18.8     |

| B.                                                    | Average number of Leaves |                 |        |          |             |                 |        |          |             |                 |        |          |
|-------------------------------------------------------|--------------------------|-----------------|--------|----------|-------------|-----------------|--------|----------|-------------|-----------------|--------|----------|
|                                                       | Rosette                  |                 |        |          | Cauline     |                 |        |          | Total       |                 |        |          |
|                                                       | All                      | In 75% earliest | Curled | Uncurled | All         | In 75% earliest | Curled | Uncurled | All         | In 75% earliest | Curled | Uncurled |
| <i>Pro<sub>35S</sub>:TFT (L.er)</i>                   | <b>2.00</b>              | 2.00            | 2.00   | -        | <b>3.90</b> | 3.42            | 3.90   | -        | <b>5.90</b> | 5.43            | 5.90   | -        |
| <i>Pro<sub>35S</sub>TFT x Col-0 ; F2</i>              | <b>3.38</b>              | 2.36            | 2.36   | 6.57     | <b>3.55</b> | 2.86            | 3.68   | 3.14     | <b>6.93</b> | 5.77            | 6.05   | 9.71     |
| <i>Pro<sub>35S</sub>TFT(L.er) xsep3-2 (Col-0); F2</i> | <b>4.53</b>              | 3.37            | 2.14   | 5.10     | <b>3.33</b> | 2.74            | 3.43   | 3.31     | <b>7.86</b> | 6.78            | 5.57   | 8.41     |

<sup>a</sup># Plants = number of plants counted.
