# Supplementary material
Source: PubMed Central journal article supplement (PMC1242264)

# Supplementary Figure 2

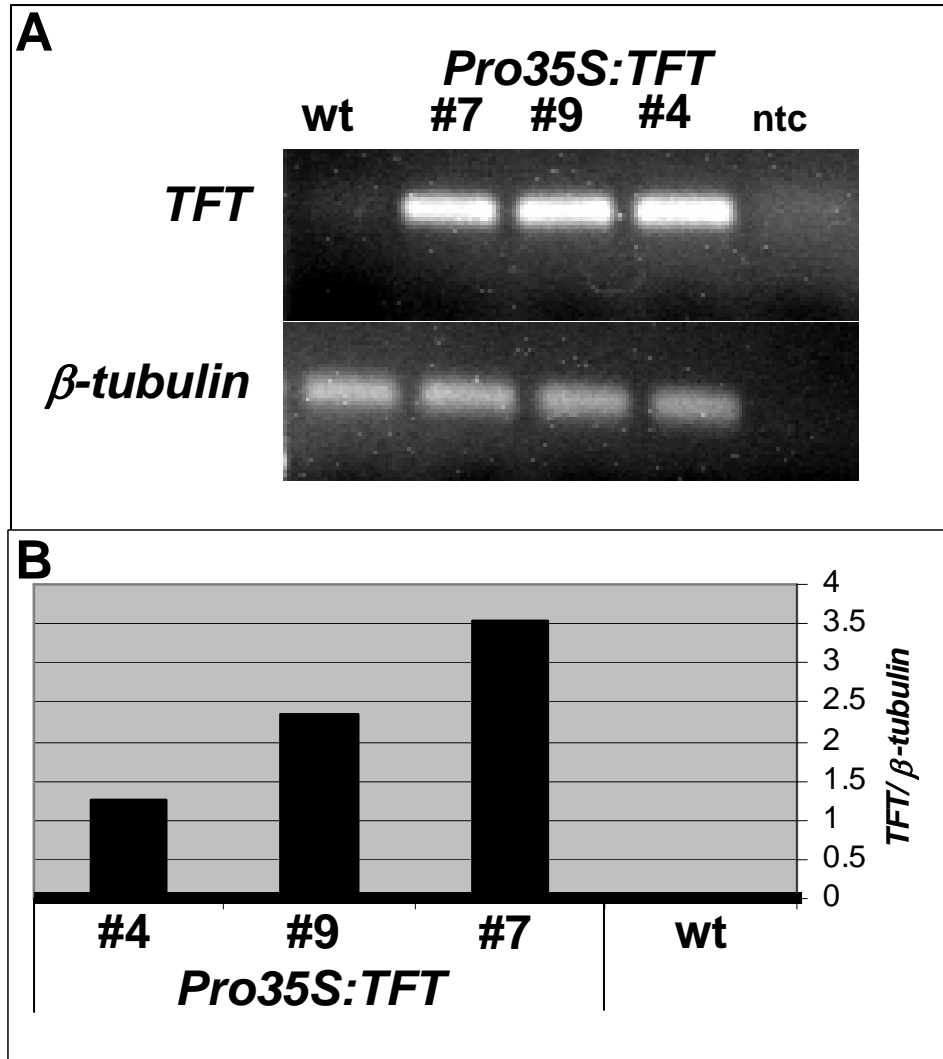

Supplement: plntcell_tpc.105.035766_2.pdf [file plntcell_tpc.105.035766_2.pdf]

# Supplementary Figure 3

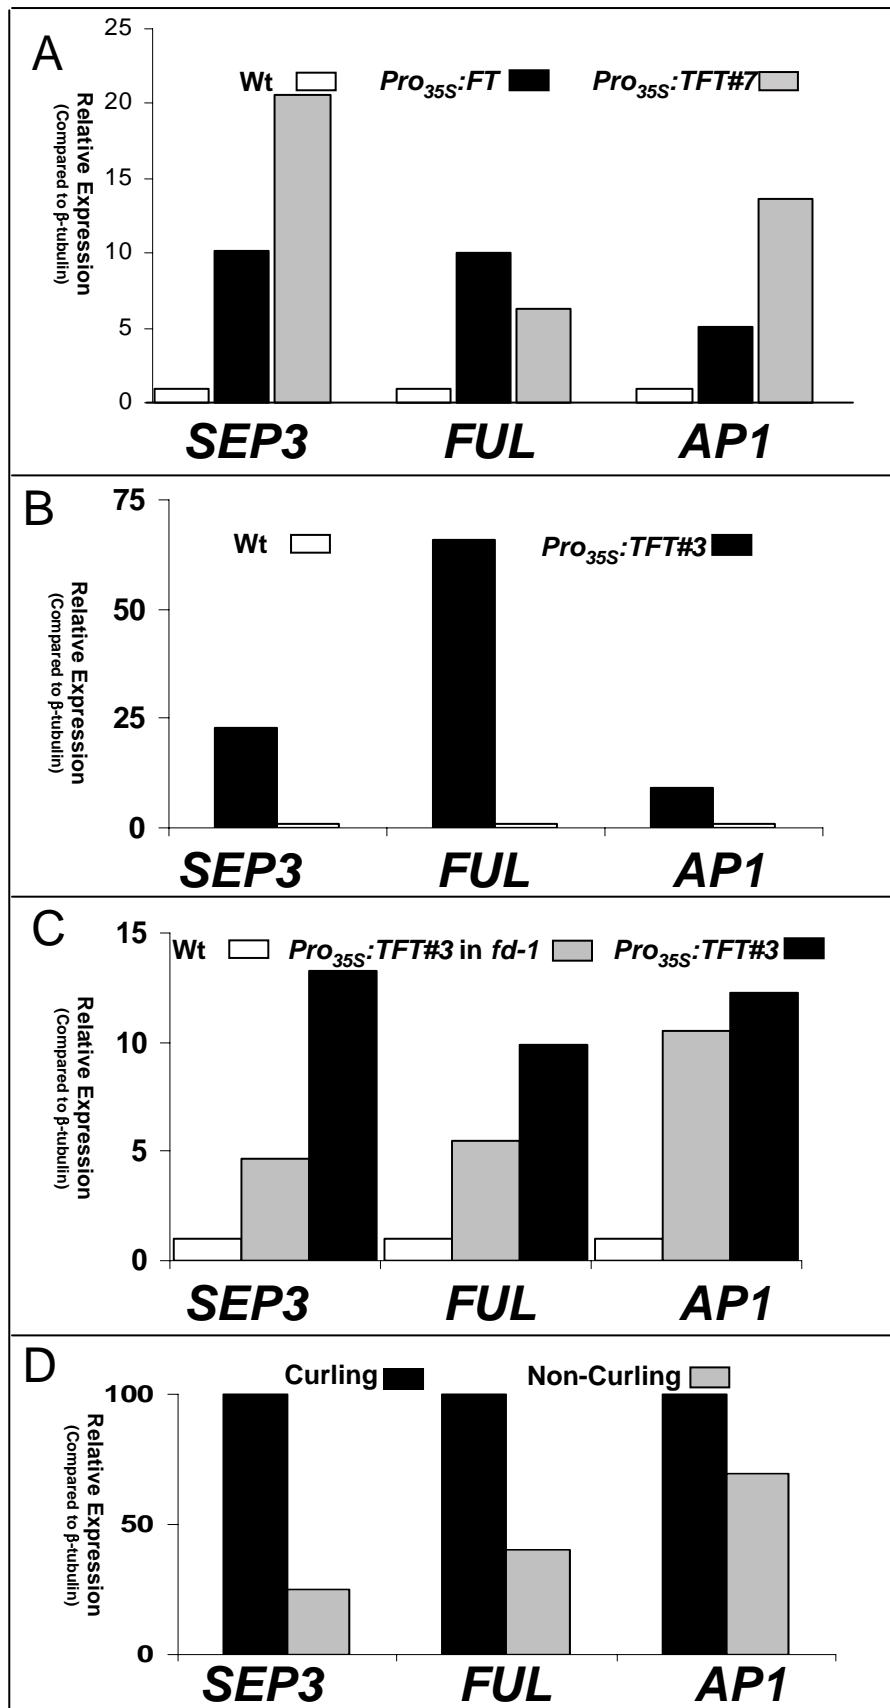

Supplement: plntcell_tpc.105.035766_3.pdf [file plntcell_tpc.105.035766_3.pdf]
